# Supplementary material for: Long-Term Survival in Patients with Post-Operative Atrial Fibrillation after Cardiac Surgery: Analysis from a Prospective Cohort Study
Source: MDPI journal article supplement (doi:10.3390/jcdd8120169), 2021-12-01
Supplement: s1 [file s1]

**Figure S1. Survival analysis in POP AF patients.** A) Unadjusted Kaplan-Meier curves in the different study subgroups; B) survival curves adjusted for age; C) survival probability fully adjusted for all the clinical variables which proved statistically significant in the multivariable model. *Legend.* 1) patients who never developed AF (control group); 2) patients with no history of AF before surgery in whom POP AF was clinically detected (new-onset POP AF); 3) patients with pre-surgical history of paroxysmal/persistent AF who developed POP AF. Comparisons between different study subgroups are reported as Hazard Ratios (HR) and related 95% confidence intervals [squared brackets] and *p* values as assessed in both univariable and multivariable analyses. POP AF: post operative atrial fibrillation.

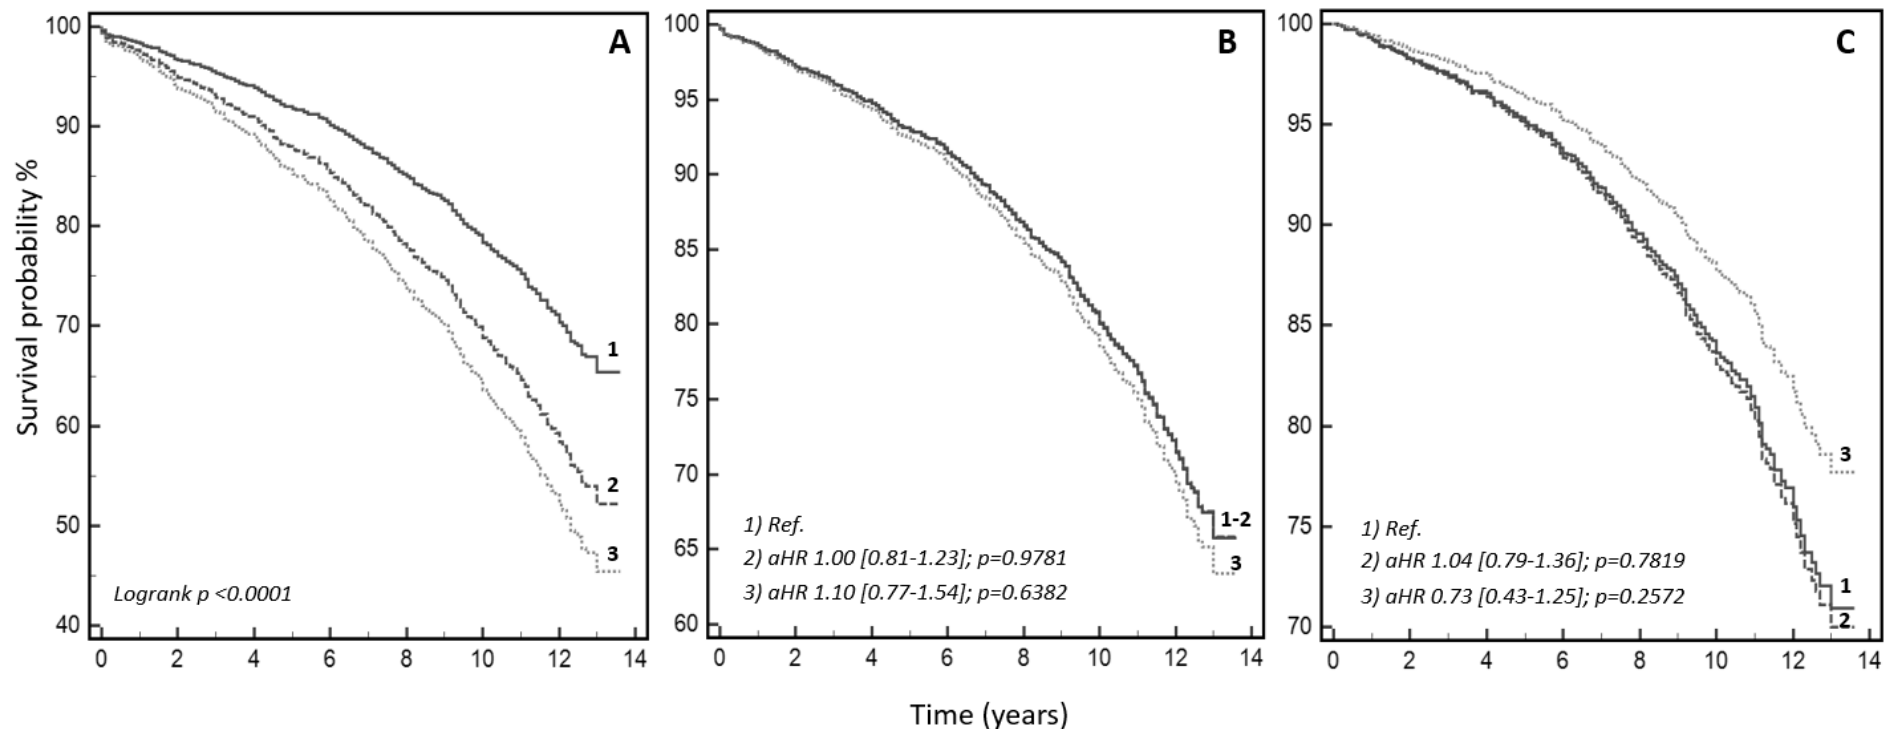

**Table S1. Features of the investigated surgical population according to history of atrial fibrillation**

|                                        | <b>Overall</b> | <b>Control group</b> | <b>New-onset POP AF</b> | <b>Paroxysmal/persistent AF before surgery</b> | <b>Permanent AF</b> | <b><i>p</i></b> |
|----------------------------------------|----------------|----------------------|-------------------------|------------------------------------------------|---------------------|-----------------|
| <b>N. patients (n, %)</b>              | 1386           | 726 (52)             | 452 (33)                | 125 (9)                                        | 83 (6)              |                 |
| <b>Age (years)</b>                     | 65 ± 12        | 62 ± 12              | 69 ± 9                  | 68 ± 10                                        | 71 ± 9              | <0.001          |
| <b>Sex F (n, %)</b>                    | 419 (30)       | 172 (24)             | 147 (32)                | 64 (51)                                        | 36 (43)             | <0.0001         |
| <b>BMI (kg/m2)</b>                     | 25 ± 5         | 25 ± 5               | 25 ± 5                  | 26 ± 5                                         | 26 ± 6              | 0.6530          |
| <b>HTN (n, %)</b>                      | 869 (65)       | 428 (59)             | 312 (69)                | 76 (61)                                        | 53 (64)             | 0.0063          |
| <b>Type II DM (n, %)</b>               | 290 (21)       | 157 (22)             | 103 (23)                | 13 (10)                                        | 17 (20)             | 0.0229          |
| <b>Prior history of CAD (n, %)</b>     | 894 (64)       | 515 (71)             | 301 (67)                | 48 (38)                                        | 30 (36)             | <0.0001         |
| <b>Prior history of HF (n, %)</b>      | 116 (8)        | 45 (6)               | 32 (7)                  | 24 (19)                                        | 15 (18)             | <0.0001         |
| <b>LVEF (%)</b>                        | 54 ± 10        | 55 ± 10              | 53 ± 10                 | 53 ± 11                                        | 53 ± 10             | 0.0570          |
| <b>COPD</b>                            | 91 (7)         | 27 (4)               | 45 (10)                 | 10 (8)                                         | 9 (11)              | 0.0001          |
| <b>Type of cardiac surgery (n, %):</b> |                |                      |                         |                                                |                     |                 |
| CABG                                   | 655 (47)       | 421 (58)             | 204 (45)                | 20 (16)                                        | 10 (12)             | <0.0001         |
| VHS                                    | 495 (36)       | 203 (28)             | 148 (33)                | 84 (67)                                        | 60 (72)             | <0.0001         |
| Cardiac Transplantation                | 31 (2)         | 27 (4)               | 0 (0)                   | 4 (3)                                          | 0 (0)               | <0.0001         |
| PCI plus CABG                          | 12 (1)         | 6 (1)                | 4 (1)                   | 1 (1)                                          | 1 (1)               | <0.0001         |
| CABG plus VHS                          | 173 (12)       | 61 (8)               | 85 (19)                 | 15 (12)                                        | 12 (14)             | <0.0001         |
| Others                                 | 20 (2)         | 8 (1)                | 11 (2)                  | 1 (1)                                          | 0 (0)               | <0.0001         |
| <b>POP complications:</b>              |                |                      |                         |                                                |                     |                 |
| Stroke                                 | 35 (3)         | 12 (2)               | 18 (4)                  | 3 (2)                                          | 2 (2)               | 0.1043          |
| Myocardial Infarction                  | 31 (2)         | 23 (3)               | 7 (2)                   | 0 (0)                                          | 1 (0)               | 0.0681          |
| Acute HF                               | 50 (4)         | 24 (3)               | 13 (3)                  | 8 (6)                                          | 5 (6)               | 0.1659          |
| Acute Respiratory Failure              | 131 (9)        | 66 (9)               | 49 (11)                 | 7 (6)                                          | 9 (11)              | 0.3228          |
| Acute renal failure                    | 158 (11)       | 59 (8)               | 73 (16)                 | 10 (8)                                         | 16 (19)             | <0.0001         |
| Infections                             | 472 (34)       | 235 (32)             | 161 (36)                | 49 (39)                                        | 27 (32)             | 0.3962          |
| DVT                                    | 158 (11)       | 71 (10)              | 66 (15)                 | 16 (13)                                        | 5 (6)               | 0.0281          |
| <b>Blood tests at admission:</b>       |                |                      |                         |                                                |                     |                 |
| POP Creatinine (mg/dL)                 | 1.26 ± 0.61    | 1.19 ± 0.59          | 1.35 ± 0.63             | 1.29 ± 0.58                                    | 1.37 ± 0.70         | <0.001          |
| POP Hb (g/dL)                          | 11.8 ± 1.19    | 11.9 ± 1.2           | 11.8 ± 1.1              | 11.7 ± 1.2                                     | 11.4 ± 1.2          | 0.001           |
| POP C-reactive protein (mg/L)          | 5.2 ± 4.2      | 5 ± 4                | 6 ± 5                   | 5 ± 4                                          | 4 ± 3               | 0.014           |

|                                     |           |           |           |           |           |         |
|-------------------------------------|-----------|-----------|-----------|-----------|-----------|---------|
| <b>In-hospital stay (days)</b>      | 21 ± 7    | 20 ± 7    | 22 ± 7    | 22 ± 7    | 24 ± 9    | <0.001  |
| <b>6-MWT at discharge (metres)</b>  | 426 ± 113 | 451 ± 107 | 405 ± 111 | 402 ± 106 | 367 ± 125 | <0.001  |
| <b>Medications after discharge:</b> |           |           |           |           |           |         |
| VKA                                 | 757 (55)  | 285 (39)  | 279 (62)  | 112 (90)  | 81 (98)   | <0.0001 |
| ACE-I                               | 739 (53)  | 374 (51)  | 254 (56)  | 63 (50)   | 48 (58)   | 0.3133  |
| ARB                                 | 136 (10)  | 62 (8)    | 48 (11)   | 17 (14)   | 9 (11)    | 0.2888  |
| Beta-blockers                       | 1010 (73) | 563 (77)  | 330 (73)  | 67 (54)   | 50 (96)   | <0.0001 |
| Antiarrhythmic medications          | 353 (25)  | 37 (5)    | 237 (52)  | 73 (58)   | 6 (7)     | <0.0001 |
| Digoxin                             | 26 (2)    | 1 (0)     | 3 (1)     | 9 (7)     | 13 (16)   | <0.0001 |
| <b>Follow-up:</b>                   |           |           |           |           |           |         |
| Average follow-up (years)           | 10 ± 3    | 10 ± 3    | 9 ± 3     | 9 ± 3     | 7 ± 4     | <0.001  |

*Abbreviations.* 6-MWT= 6-minute walking test; ACE-I= angiotensin converting enzyme-inhibitor; AF= atrial fibrillation; ARB= Angiotensin Receptor Blockers; CABG= coronary artery bypass surgery; COPD= chronic obstructive pulmonary disease; DVT=deep vein thrombosis; BMI= body mass index; CAD= coronary artery disease; DM= diabetes mellitus; LVEF= left ventricular ejection fraction; HF= Heart Failure; HTN=hypertension; F=female; VHS=valvular heart surgery; VKA= vitamin-K antagonists.
